# Supplementary material for: The association between SAα2,3Gal occurrence frequency and avian influenza viral load in mallards (Anas platyrhynchos) and blue-winged teals (Spatula discors)
Source: PubMed Central journal article supplement (PMC7653716; doi:10.1186/s12917-020-02642-7), 2020-11-10

**Blue-winged Teal - Cloaca Swab Virus Titer MLR model supporting material**

**Global Model:**  $Swab\ Titer = 1 + factor(Sex) + mass + age + BCS + factor(group) + Proximal\ Villi + Proximal\ Brush\ Border + Proximal\ Crypts + Ileum\ Villi + Cecum\ Villi + Cecum\ Brush\ Border + Cecum\ Crypts + Colon\ Villi + Colon\ Brush\ Border + Colon\ Crypts + Bursa$

**Final Model:**  $Swab\ Titer = 1 + factor(Sex) + mass + BCS + factor(group) + Proximal\ Crypts + Bursa$

| Y                                   | N  | R <sup>2</sup> | X               | EST. (95% CI)<br>LOG <sub>10</sub> (EID <sub>50</sub> /ML) | P      |
|-------------------------------------|----|----------------|-----------------|------------------------------------------------------------|--------|
| <b>TEAL CLOACA SWAB VIRUS TITER</b> | 32 | 0.61           | Intercept       | 8.35 (-7.50 to 24.20)                                      | 0.288  |
|                                     |    |                | Sex (Male)      | -0.60 (-1.30 to 0.09)                                      | 0.086  |
|                                     |    |                | mass            | 0.01 (0.01 to 0.02)                                        | 0.001  |
|                                     |    |                | BCS             | -0.81 (-1.50 to -0.12)                                     | 0.023  |
|                                     |    |                | group (T3)      | -0.12 (-0.97 to 0.73)                                      | 0.780  |
|                                     |    |                | group (T5)      | -1.92 (-2.67 to -1.17)                                     | <0.001 |
|                                     |    |                | Proximal Crypts | -4.88 (-12.23 to 2.54)                                     | 0.189  |
|                                     |    |                | Bursa           | 1.66 (-0.11 to 3.42)                                       | 0.064  |

Y = dependent variable, N = number of individual birds in model, X = independent variables in final model, CI = 95% confidence interval, p = p-value. Proximal includes the duodenum and jejunum. BCS = Body Condition Score. Group and Sex were treated as factors in each model, and if present in final model, group T1 and females are represented in the intercept.

| Step | Model                   | AIC   | ΔAIC |
|------|-------------------------|-------|------|
| NA   | Global                  | -0.09 | NA   |
| 1    | Global – Colon Crypts   | -0.09 | 0.00 |
| 2    | Step 1 – Colon Villi    | -0.09 | 0.00 |
| 3    | Step 2 – Colon BB       | -0.09 | 0.00 |
| 4    | Step 3 – Ileum Villi    | -0.09 | 0.00 |
| 5    | Step 4 – Proximal BB    | -2.09 | 2.00 |
| 6    | Step 5 – Cecum Villi    | -4.04 | 1.95 |
| 7    | Step 6 – Cecum Crypts   | -5.73 | 1.69 |
| 8    | Step 7 - age            | -7.46 | 1.73 |
| 9    | Step 8 – Cecum BB       | -8.21 | 0.75 |
| 10   | Step 9 – Proximal Villi | -8.31 | 0.10 |

# Residual Plots

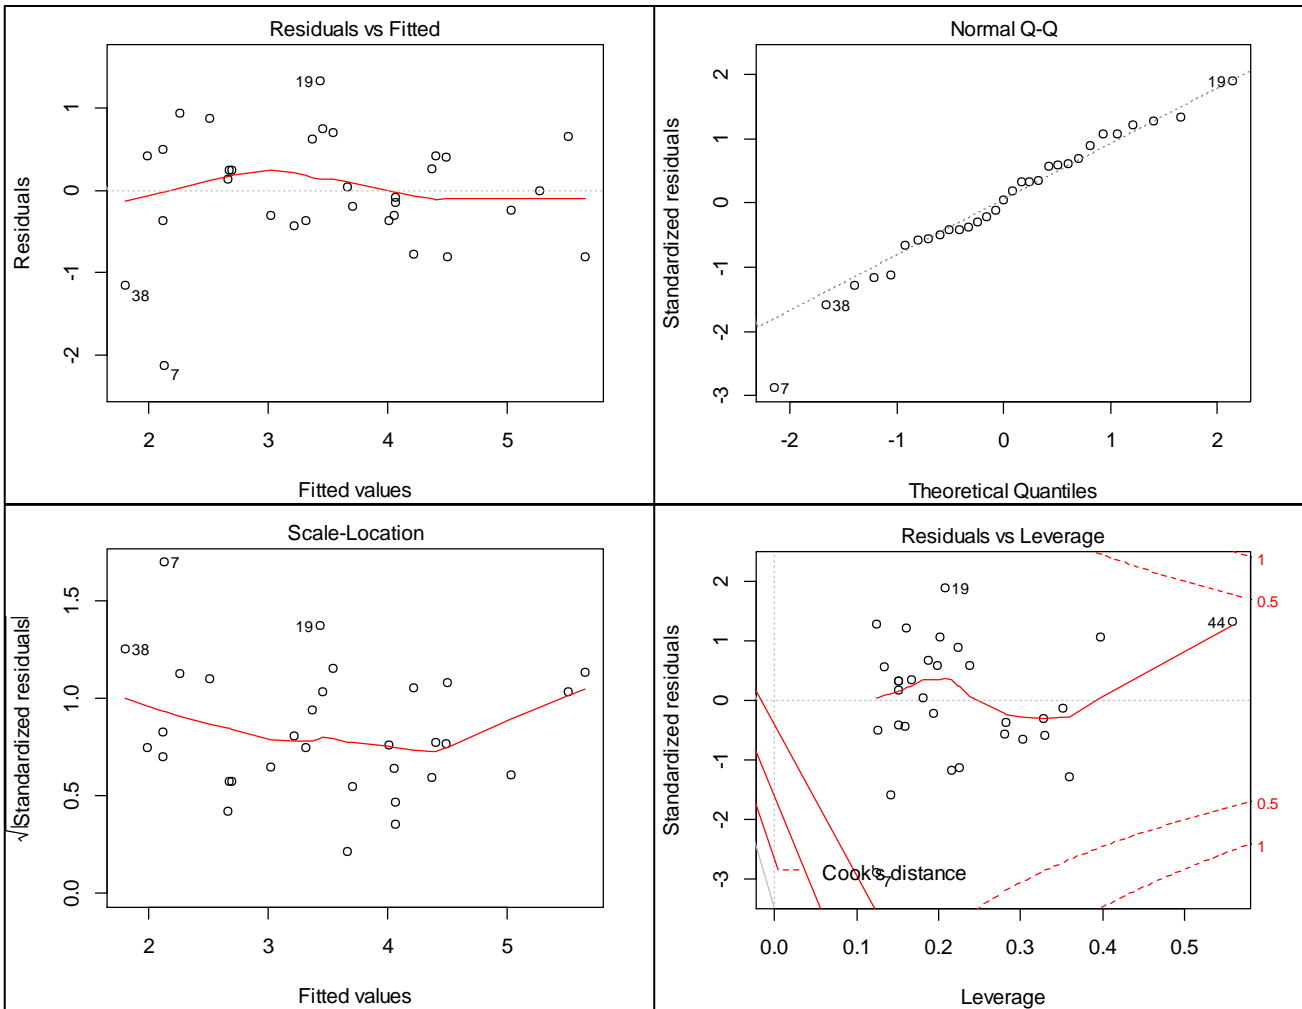

Supplement: 12917_2020_2642_MOESM8_ESM.pdf [file 12917_2020_2642_MOESM8_ESM.pdf]
