# Supplementary material for: The association between SAα2,3Gal occurrence frequency and avian influenza viral load in mallards (Anas platyrhynchos) and blue-winged teals (Spatula discors)
Source: PubMed Central journal article supplement (PMC7653716; doi:10.1186/s12917-020-02642-7), 2020-11-10

## Mallard

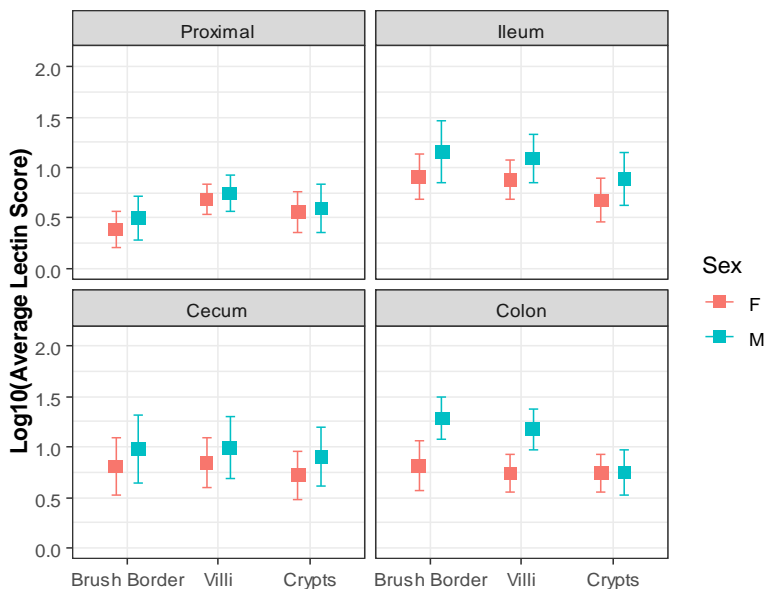

## Teal

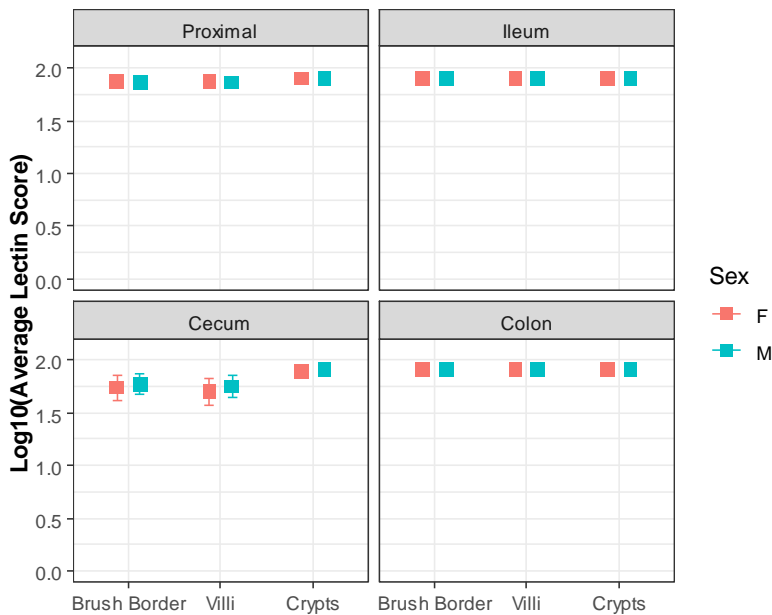

Supplement: 12917_2020_2642_MOESM4_ESM.pdf [file 12917_2020_2642_MOESM4_ESM.pdf]
