# Supplementary material for: The association between SAα2,3Gal occurrence frequency and avian influenza viral load in mallards (Anas platyrhynchos) and blue-winged teals (Spatula discors)
Source: PubMed Central journal article supplement (PMC7653716; doi:10.1186/s12917-020-02642-7), 2020-11-10

**Mallard - Cloaca Swab Virus Titer MLR model supporting material**

**Global Model:**  $Swab\ Titer = 1 + factor(Sex) + mass + age + BCS + factor(group) + ProximalPC + Ileum\ Villi + Ileum\ Brush\ Border + Ileum\ Crypts + CecumPC + Colon\ Villi + Colon\ Brush\ Border + Colon\ Crypts$

**Final Model:**  $Swab\ Titer = 1 + factor(Sex) + ProximalPC + Ileum\ Villi + Ileum\ Brush\ Border$

| Step | Model                 | AIC   | ΔAIC |
|------|-----------------------|-------|------|
| NA   | Global                | 26.83 | NA   |
| 1    | Global – group        | 23.12 | 3.70 |
| 2    | Step 1 – Ileum Crypts | 21.14 | 1.99 |
| 3    | Step 2 – Cecum PC     | 19.20 | 1.94 |
| 4    | Step 3 – age          | 17.83 | 1.37 |
| 5    | Step 4 – mass         | 16.11 | 1.72 |
| 6    | Step 5 – Colon Crypts | 14.55 | 1.56 |
| 7    | Step 6 – BCS          | 14.07 | 0.48 |
| 8    | Step 7 – Colon BB     | 13.22 | 0.86 |
| 9    | Step 8 – Colon Villi  | 11.44 | 1.77 |

**Residual Plots**

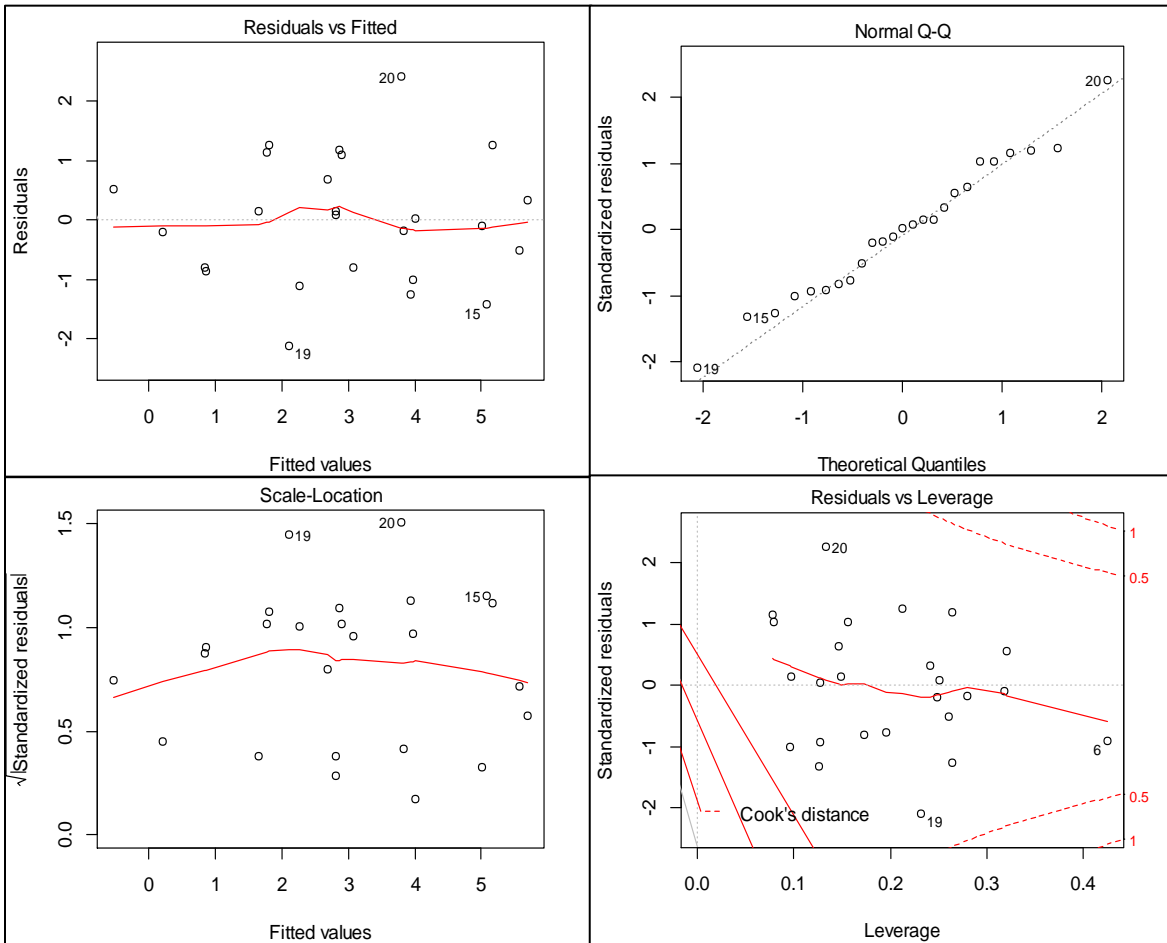

Supplement: 12917_2020_2642_MOESM6_ESM.pdf [file 12917_2020_2642_MOESM6_ESM.pdf]
