# Supplementary material for: The association between SAα2,3Gal occurrence frequency and avian influenza viral load in mallards (Anas platyrhynchos) and blue-winged teals (Spatula discors)
Source: PubMed Central journal article supplement (PMC7653716; doi:10.1186/s12917-020-02642-7), 2020-11-10

**Mallard - Ileum Virus Titer MLR model supporting material**

**Global Model:**  $Ileum\ Titer = 1 + factor(Sex) + mass + age + BCS + factor(group) + Ileum\ Villi + Ileum\ Brush\ Border + Ileum\ Crypts$

**Final Model:**  $Ileum\ Titer = 1 + factor(Sex) + ProximalPC + Ileum\ Villi + Ileum\ Brush\ Border$

| Step | Model                 | AIC   | ΔAIC |
|------|-----------------------|-------|------|
| NA   | Global                | 44.13 | NA   |
| 1    | Global - group        | 40.65 | 3.48 |
| 2    | Step 1 - age          | 38.65 | 2.00 |
| 3    | Step 2 - BCS          | 36.69 | 1.96 |
| 4    | Step 3 – Ileum Crypts | 34.90 | 1.79 |
| 5    | Step 4 - mass         | 33.57 | 1.32 |

**Residual Plots**

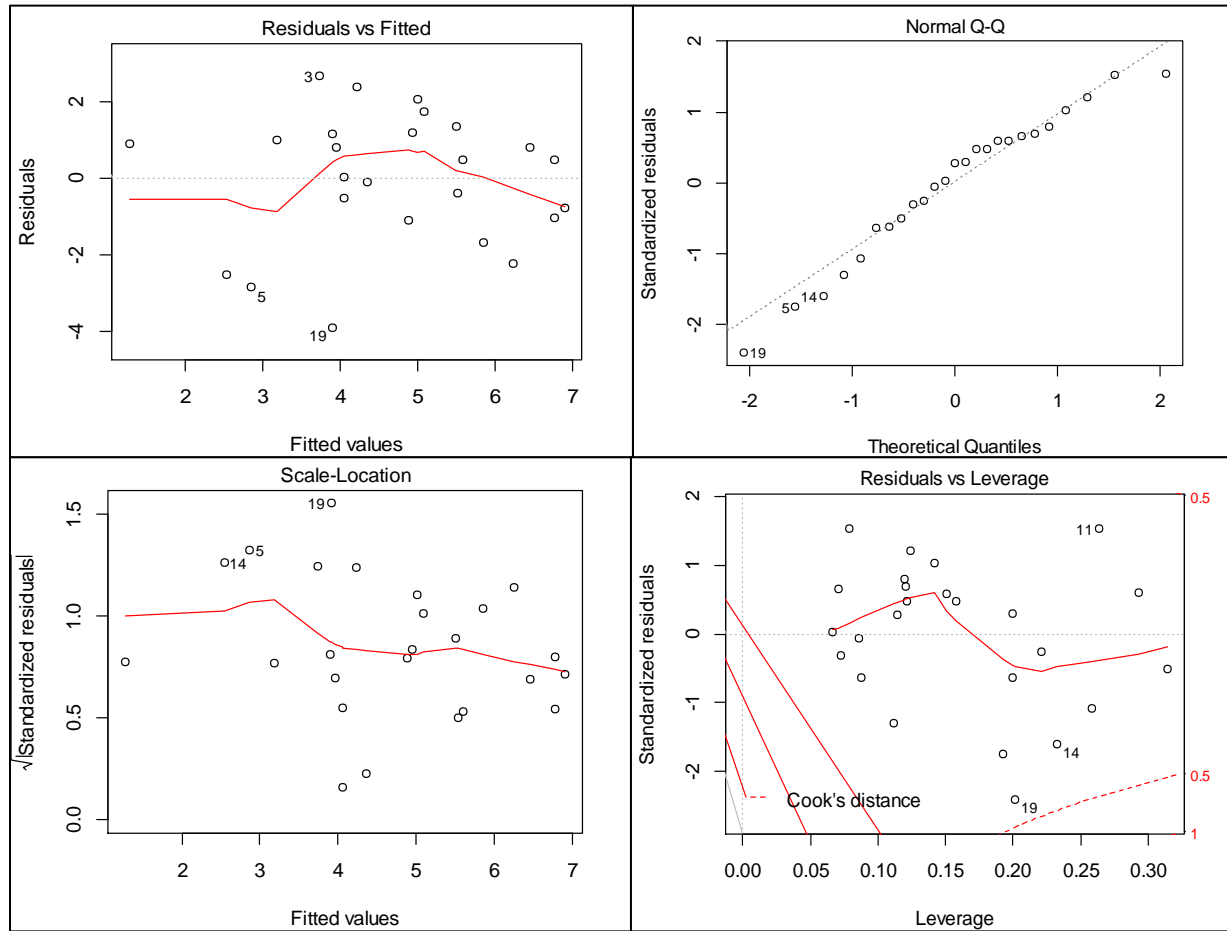

Supplement: 12917_2020_2642_MOESM7_ESM.pdf [file 12917_2020_2642_MOESM7_ESM.pdf]
