# Supplementary material for: The association between SAα2,3Gal occurrence frequency and avian influenza viral load in mallards (Anas platyrhynchos) and blue-winged teals (Spatula discors)
Source: PubMed Central journal article supplement (PMC7653716; doi:10.1186/s12917-020-02642-7), 2020-11-10

**Blue-winged teal Ileum Virus Titer MLR model supporting material**

**Global Model:**  $Ileum\ Titer = 1 + factor(Sex) + mass + age + BCS + factor(group) + Ileum\ Villi$

**Final Model:**  $Ileum\ Titer = 1 + BCS + factor(group)$

| STEP | MODEL                | AIC      | ΔAIC     |
|------|----------------------|----------|----------|
| NA   | Global               | 38.3996  | NA       |
| 1    | Global – Ileum Villi | 38.3996  | 0        |
| 2    | Step 1 - Sex         | 36.39985 | 1.999755 |
| 3    | Step 2 - mass        | 34.40121 | 1.998643 |
| 4    | Step 3 - age         | 32.41009 | 1.991114 |

| Y                | N  | R <sup>2</sup> | X          | EST. (95% CI)<br>LOG <sub>10</sub> (EID <sub>50</sub> /ML) | P      |
|------------------|----|----------------|------------|------------------------------------------------------------|--------|
| TEAL ILEUM TITER | 32 | 0.44           | Intercept  | 10.03 (5.71 to 14.35)                                      | <0.001 |
|                  |    |                | BCS        | -0.86 (-1.91 to 0.19)                                      | 0.103  |
|                  |    |                | group (T3) | -1.05 (-2.54 to 0.47)                                      | 0.169  |
|                  |    |                | Group (T5) | -3.42 (-4.88 to -1.97)                                     | <0.001 |

Y = dependent variable, N = number of individual birds in model, X = independent variables in final model, CI = 95% confidence interval, p = p-value. BCS = Body Condition Score. Group was treated as a factor and group T1 is represented in the intercept.

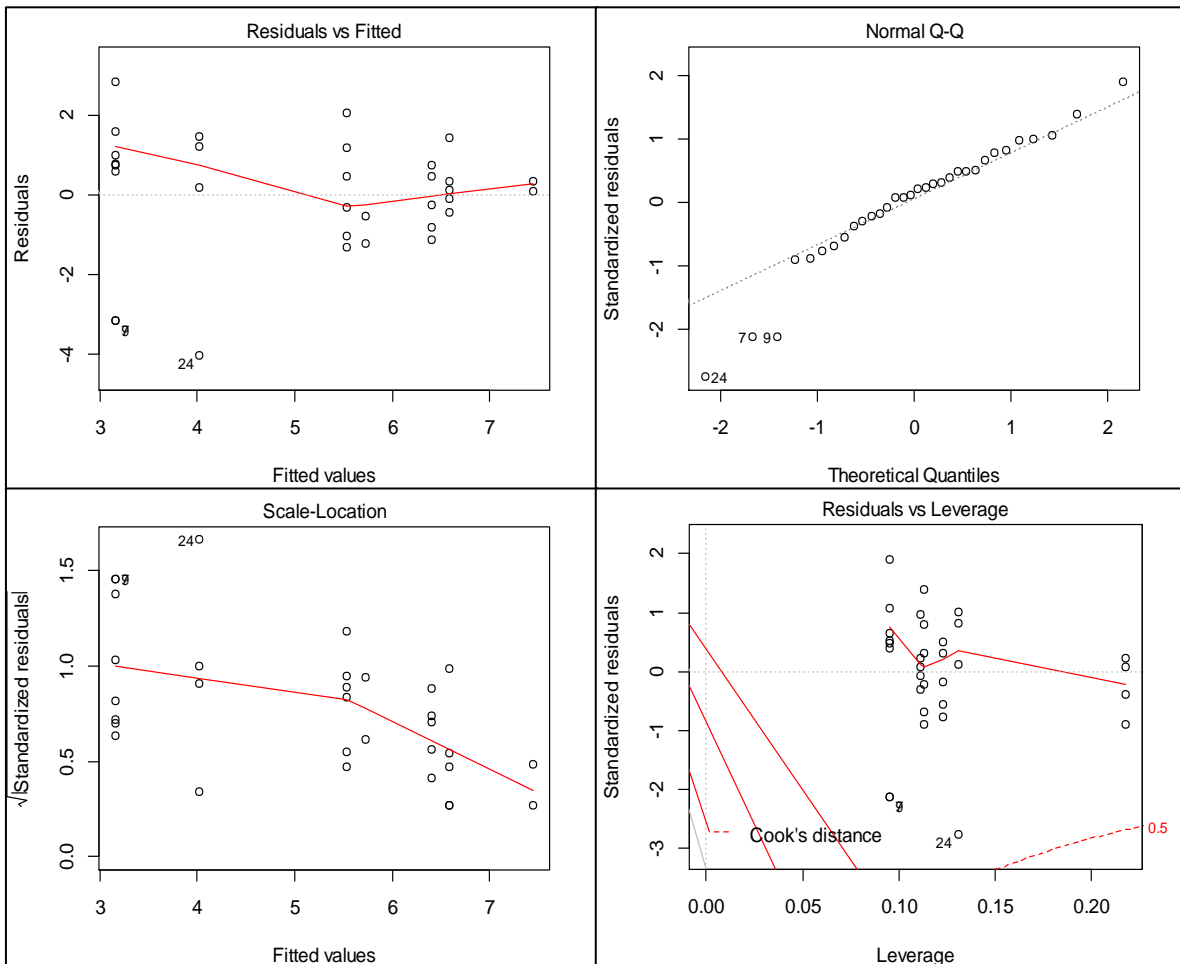

Supplement: 12917_2020_2642_MOESM10_ESM.pdf [file 12917_2020_2642_MOESM10_ESM.pdf]
