# Supplementary material for: The association between SAα2,3Gal occurrence frequency and avian influenza viral load in mallards (Anas platyrhynchos) and blue-winged teals (Spatula discors)
Source: PubMed Central journal article supplement (PMC7653716; doi:10.1186/s12917-020-02642-7), 2020-11-10

**Blue-winged teal Bursa Virus Titer MLR model supporting material**

**Global Model:**  $Bursa\ Titer = 1 + factor(Sex) + mass + age + BCS + factor(group) + Bursa$

**Initial Model:**  $Bursa\ Titer = 1 + BCS + mass + factor(group)$

**Residual Plots for initial multiple linear regression model *Blue-winged teal Bursa Titer*.**

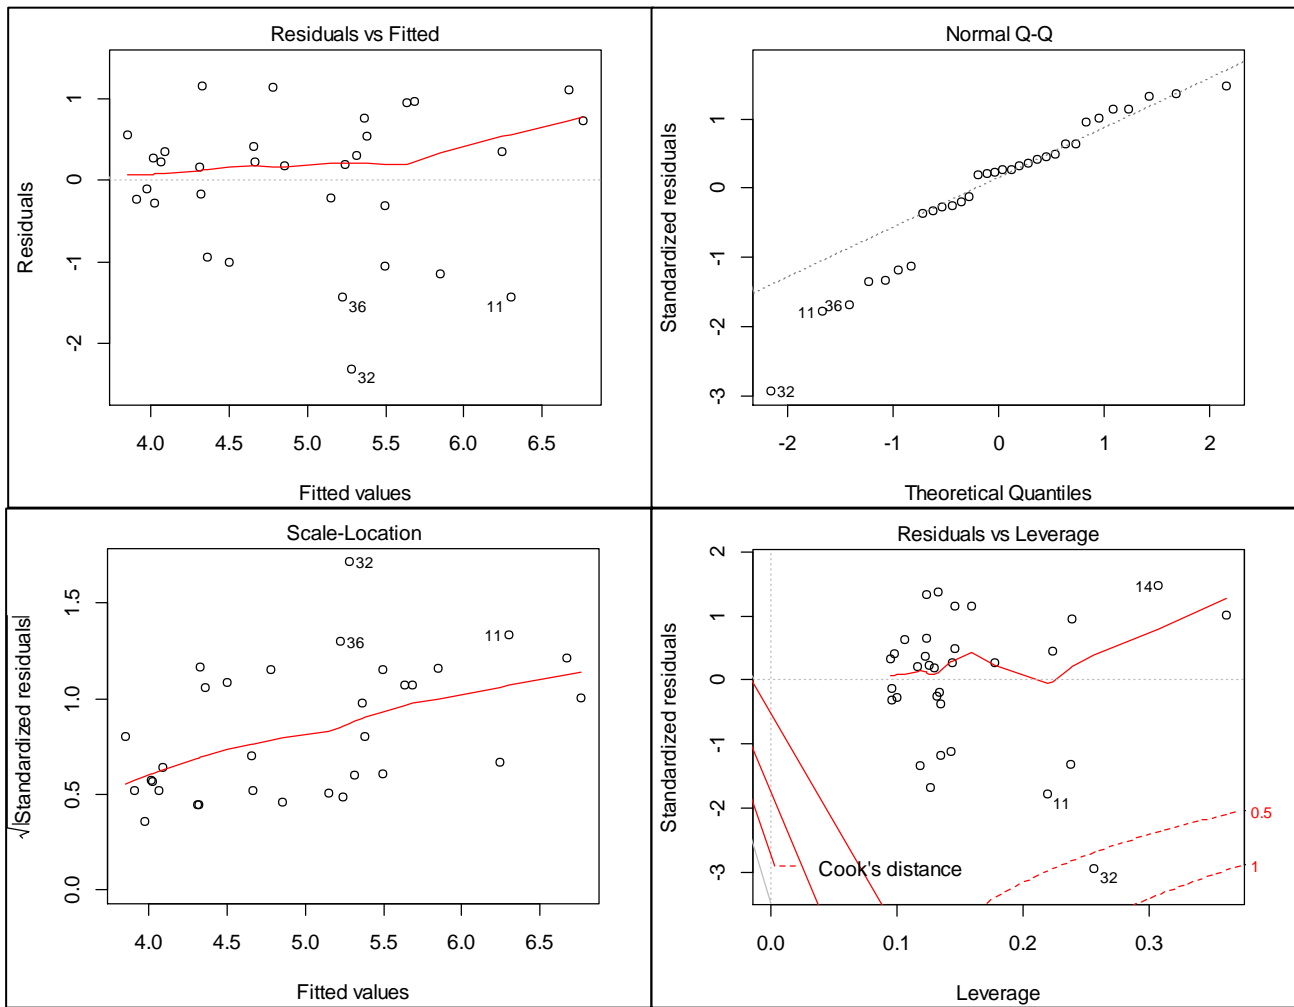

Final Model:  $Bursa\ Titer = 1 + BCS + factor(group)$

| STEP   | MODEL          | AIC   | ΔAIC  |
|--------|----------------|-------|-------|
| NA     | Global         | 2.14  | NA    |
| 1      | Global - Sex   | 0.15  | 2.00  |
| 2      | Step 1 - Bursa | -1.60 | 1.75  |
| MANUAL | Step 2 - mass  | -0.25 | -1.35 |

| Y                | N  | R <sup>2</sup> | X          | EST. (95% CI)          | P       |
|------------------|----|----------------|------------|------------------------|---------|
| TEAL BURSA TITER | 32 | 0.37           | Intercept  | 7.52 (4.92 to 10.11)   | < 0.001 |
|                  |    |                | BCS        | -0.38 (-1.01 to 0.24)  | 0.220   |
|                  |    |                | group (T3) | -1.04 (-1.95 to -0.13) | 0.027   |
|                  |    |                | group (T5) | -1.96 (-2.83 to -1.08) | < 0.001 |

Y = dependent variable, N = number of individual birds in model, X = independent variables in final model, CI = 95% confidence interval, p = p-value. BCS = Body Condition Score. Group was treated as a factor and group T1 is represented in the intercept.

**Residual Plots for final multiple linear regression model *Blue-winged teal Bursa Titer*.**

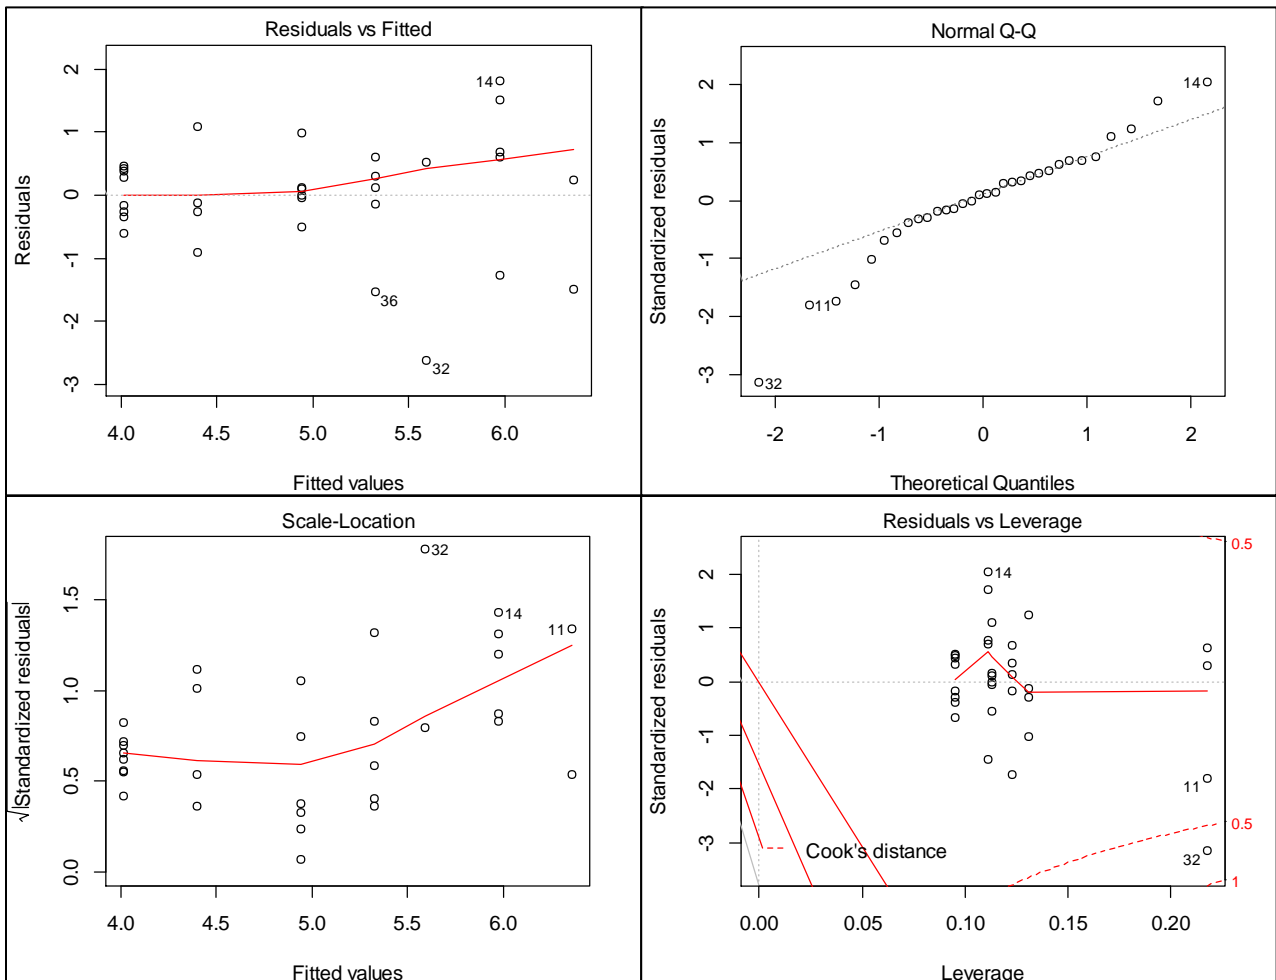

Supplement: 12917_2020_2642_MOESM11_ESM.pdf [file 12917_2020_2642_MOESM11_ESM.pdf]
